# Supplementary material for: Deformation induced evolution of plasmonic responses in polymer grafted nanoparticle thin films
Source: Royal Society of Chemistry journal article supplement (doi:10.1039/d4nr00789a), 2024-01-01
Supplement: d4nr00789a1.pdf [file d4nr00789a1.pdf]

Supplementary Information for

## **Deformation Induced Evolution of Plasmonic Response in Polymer Grafted Nanoparticle Thin Films**

Talem Rebeda Roy<sup>a</sup>, Shourya Dutta-Gupta<sup>\*,b</sup>, and Balaji V. S. Iyer<sup>\*,a</sup>

<sup>a</sup> Chemical Engineering, Indian Institute of Technology Hyderabad, Sangareddy 502284, Telangana, India

<sup>b</sup> Materials Science and Metallurgical Engineering, Indian Institute of Technology Hyderabad, Sangareddy 502284, Telangana, India.

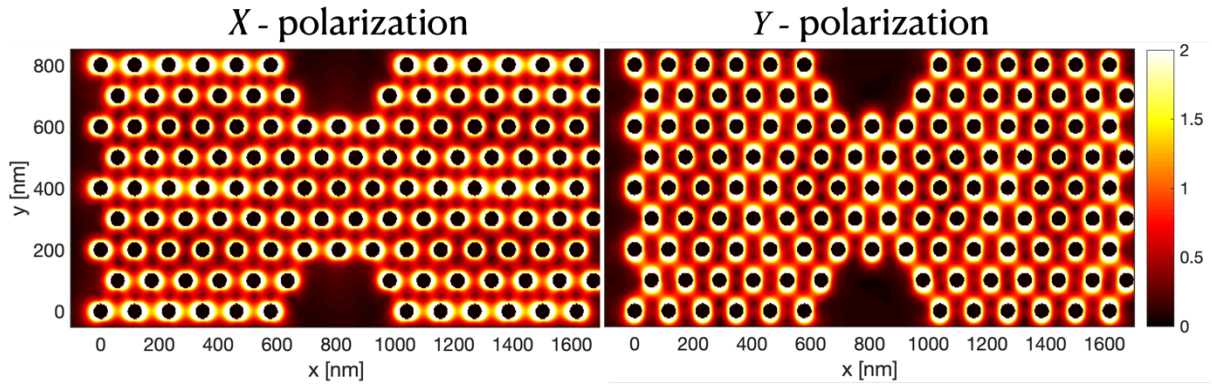

**Figure S1:** Electric field plots for an array of 125 PGPNs for incident light with X and Y-polarization.

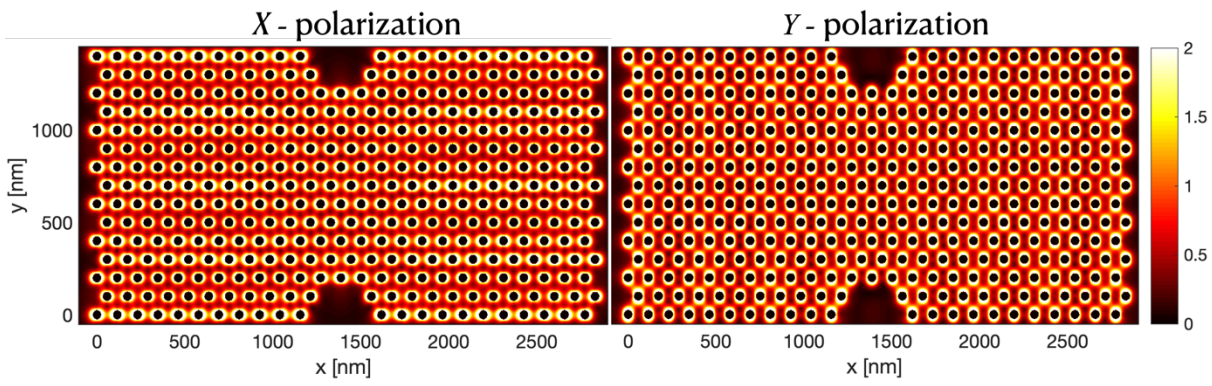

**Figure S2:** Electric field plots for an array of 365 PGPNs for incident light with X and Y-polarization.

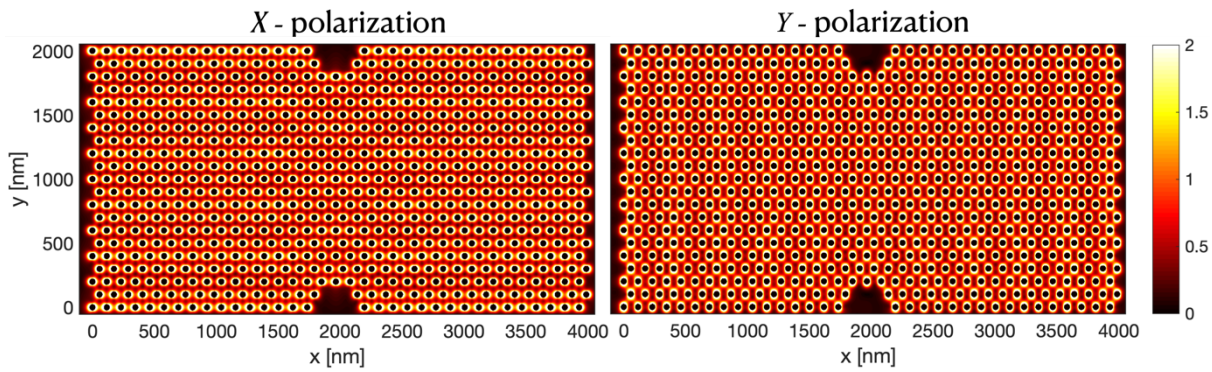

**Figure S3:** Electric field plots for an array of 735 PGPNs for incident light with X and Y-polarization.
